# Supplementary material for: Sit4 Genetically Interacts with Vps27 to Regulate Mitochondrial Function and Lifespan in Saccharomyces cerevisiae
Source: Cells. 2024 Apr 9;13(8):655. doi: 10.3390/cells13080655 (PMC11049076; doi:10.3390/cells13080655)
Supplement: Supplementary file 1 [file cells-13-00655-s001.zip › Table S1.xlsx]

## Sheet: Table S1 - Protein levels
Levels of vacuolar membrane proteins in wild type and sit4∆ samples
* - proteins only detected in sit4∆ samples; ** - protein only detected in wild type samples
Accession	Gene Symbol	Gene ID	Abundance (normalized) wild type				Abundance (normalized) sit4∆				Ratio sit4∆/wt	p-value
			Sample 1	Sample 2	Sample 3	Mean	Sample 1	Sample 2	Sample 3	Mean
Q12078	SMF3	D6VY36; Q12078; sce:YLR034C	1.07009e+09	1.08888e+09	1.15952e+09	1.10616e+09	2.23799e+09	2.02651e+09	2.07646e+09	2.11365e+09	1.9108	0.000130787
P25351	YCR023C	D6VR32; P25351; Q8NKJ7; sce:YCR023C	1.64663e+08	1.94076e+08	1.86515e+08	1.81751e+08	3.41849e+08	3.70705e+08	3.71828e+08	3.61461e+08	1.98876	0.000168126
P53262	VOA1	D6VUN8; P53262; sce:YGR106C	6.80697e+07	7.11655e+07	8.26759e+07	7.39704e+07	1.20324e+07	2.0834e+07	2.02562e+07	1.77075e+07	0.239387	0.000437616
P47818	CCC1	D6VYM0; P47818; sce:YLR220W	1.45533e+09	1.69844e+09	1.46263e+09	1.5388e+09	2.88273e+09	2.94341e+09	2.62832e+09	2.81815e+09	1.8314	0.000517922
P53059	MNT2	D6VV78; P53059; sce:YGL257C	6.86139e+06	8.13283e+06	7.29278e+06	7.429e+06	299904	1.17833e+06	2.24399e+06	1.24074e+06	0.167013	0.000784831
P38310	FTH1	D6VQK4; P38310; Q9URQ1; sce:YBR207W	2.41387e+08	2.59641e+08	2.51107e+08	2.50712e+08	4.74108e+08	4.16488e+08	4.92974e+08	4.6119e+08	1.83952	0.00087404
P36051	MCD4	D6VX34; P36051; sce:YKL165C	2.01977e+08	2.52518e+08	2.57981e+08	2.37492e+08	5.79625e+07	8.55769e+07	8.68867e+07	7.68087e+07	0.323416	0.00134472
P33894	STE13	D6W2S4; P33894; Q9URF1; sce:YOR219C	2.28655e+07	2.40727e+07	2.10738e+07	2.26706e+07	6.89296e+06	1.08688e+07	1.1506e+07	9.75592e+06	0.430333	0.00156044
Q04301	VBA1	D6VZR1; Q04301; sce:YMR088C	2.33312e+08	2.64188e+08	2.48263e+08	2.48588e+08	3.51955e+08	3.26075e+08	3.3396e+08	3.3733e+08	1.35699	0.00164824
P38146	YPT10	D6VQR1; P38146; sce:YBR264C	1.28343e+08	1.26508e+08	1.35078e+08	1.29976e+08	8.89767e+07	6.63607e+07	7.23314e+07	7.58896e+07	0.583873	0.00172602
P53925	YNL115C	B0KZS0; D6W167; P53925; Q6B2V3; sce:YNL115C	1.18492e+09	1.42232e+09	1.29267e+09	1.29997e+09	2.29239e+09	2.54161e+09	2.11732e+09	2.31711e+09	1.78243	0.00195498
Q02896	YDC1	D6W3T0; Q02896; sce:YPL087W	2.61008e+07	3.04908e+07	24620492	2.70707e+07	1.61772e+07	1.31071e+07	1.41407e+07	1.4475e+07	0.534711	0.00312993
P38247	SLM4	D6VQ76; P38247; sce:YBR077C	9.15771e+06	9.47833e+06	8.20088e+06	8.94564e+06	2.70923e+07	3.06333e+07	2.10939e+07	2.62732e+07	2.93698	0.0035133
P43585	VTC2	D6VTM5; P43585; sce:YFL004W	2.19128e+09	1.9361e+09	1.90618e+09	2.01119e+09	1.3344e+09	9.10391e+08	1.10016e+09	1.11498e+09	0.55439	0.00417687
P47170	IML1	D6VWV7; P47170; sce:YJR138W	2.96477e+07	2.74475e+07	3.45419e+07	3.05457e+07	1.51755e+07	6.6016e+06	1.22313e+07	1.13361e+07	0.371121	0.00421567
P22855	AMS1	D6VTZ5; P22855; sce:YGL156W	1.64372e+08	2.79378e+08	8.89403e+07	1.77563e+08	5.72619e+08	8.17907e+08	7.51854e+08	7.14127e+08	4.02181	0.00428027
P32602	SEC17	D6VPU9; P32602; sce:YBL050W	1.05115e+08	6.8805e+07	7.08726e+07	8.15976e+07	1.79175e+08	1.83508e+08	1.51375e+08	1.71353e+08	2.09997	0.00441112
Q12697	YPK9	D6W2Y9; Q12697; sce:YOR291W	1.18492e+09	1.43171e+09	1.74693e+09	1.45452e+09	5.47244e+08	4.81763e+08	5.83763e+08	5.3759e+08	0.3696	0.00517265
P32386	YBT1	D6VXW0; P32386; Q07882; sce:YLL048C	9.73025e+09	1.03416e+10	1.15728e+10	1.05482e+10	7.64511e+09	6.99707e+09	6.17808e+09	6.94009e+09	0.657941	0.00633105
P19524	MYO2	D6W323; P19524; sce:YOR326W	1.89865e+08	1.49753e+08	1.17211e+08	1.52276e+08	5.14448e+07	3.50165e+07	4.79308e+07	4.47974e+07	0.294185	0.00761572
Q06538	CSC1	D6VYN9; Q06538; sce:YLR241W	5.62276e+08	5.79794e+08	6.53399e+08	5.9849e+08	3.61565e+08	4.38448e+08	4.37201e+08	4.12405e+08	0.689076	0.00788179
P39548	YAR028W	D6VPN0; P39548; sce:YAR028W	4.52812e+07	3.73827e+07	2.2128e+07	3.49307e+07	1.80397e+08	1.13297e+08	1.26791e+08	1.40162e+08	4.01257	0.00819398
P25591	VAC17	D6VQV5; P25590; P25591; sce:YCL063W	2.15038e+06	864352	1.29118e+06	1.4353e+06	3.31524e+06	3.13418e+06	3.68604e+06	3.37849e+06	2.35385	0.00916251
P53134	YGL114W	D6VU33; P53134; sce:YGL114W	2.25335e+08	2.30798e+08	2.27218e+08	2.27784e+08	4.36581e+08	4.95535e+08	3.46161e+08	4.26093e+08	1.8706	0.0103216
P40343	VPS27	D6W1I1; P40343; sce:YNR006W	473407	833100	157920	488143	2.43901e+06	1.45709e+06	2.1055e+06	2.00053e+06	4.09826	0.0122026
P25568	ATG22	D6VQX7; P25568; sce:YCL038C	2.03736e+08	2.23597e+08	2.00042e+08	2.09125e+08	3.21525e+08	2.67021e+08	3.44883e+08	3.11143e+08	1.48783	0.0135256
Q03212	EAR1	D6VZZ3; Q03212; Q03830; sce:YMR171C	2.41662e+07	2.4256e+07	2.19024e+07	2.34415e+07	8.96361e+06	1.78445e+07	1.10061e+07	1.26047e+07	0.53771	0.0178544
Q03897	MTC5	D6VSB4; Q03897; sce:YDR128W	3.70077e+07	2.74443e+07	2.41949e+07	2.95489e+07	1.5043e+07	1.37024e+07	1.6276e+07	1.50071e+07	0.507874	0.0206037
Q04991	FMP42	D6W046; Q04991; sce:YMR221C	8.64336e+08	1.01365e+09	8.81991e+08	9.19993e+08	1.87341e+09	1.62122e+09	1.26616e+09	1.58693e+09	1.72494	0.0216186
Q04934	IVY1	D6VSL1; Q04934; sce:YDR229W	9.67262e+06	1.1774e+07	2.4316e+07	1.52542e+07	6.18689e+07	4.14798e+07	3.7589e+07	4.69792e+07	3.07975	0.0227223
P39925	AFG3	D3DLR5; P39925; sce:YER017C	2.23147e+08	1.86034e+08	1.10981e+08	1.73387e+08	4.80899e+07	4.53783e+07	6.60758e+07	5.31813e+07	0.30672	0.023272
P34240	ZRT3	D6VX25; P34240; sce:YKL175W	2.72756e+08	2.71007e+08	3.94099e+08	3.12621e+08	5.31977e+08	7.7821e+08	9.27777e+08	7.45988e+08	2.38624	0.0239818
P38270	ATG14	D6VQC5; P38270; sce:YBR128C	8.07328e+06	7.95859e+06	1.48971e+07	1.03096e+07	1.01675e+06	3.57593e+06	1.52293e+06	2.03854e+06	0.197731	0.0269639
P27809	KRE2	D6VTA6; P27809; sce:YDR483W	2.42996e+08	2.19908e+08	1.26908e+08	1.96604e+08	6.14052e+07	6.08117e+07	9.20722e+07	7.14297e+07	0.363318	0.0275912
P42839	VNX1	D6W0M5; P42839; sce:YNL321W	6.58588e+08	6.54318e+08	5.01457e+08	6.04788e+08	1.05537e+09	7.84664e+08	9.14217e+08	9.18085e+08	1.51803	0.0287484
P42951	LSB6	D6VW84; P42951; sce:YJL100W	7.44403e+07	6.83735e+07	6.95303e+07	7.07814e+07	1.04602e+08	8.35106e+07	8.96378e+07	9.25834e+07	1.30802	0.0289288
Q05902	ECM38	D6VYU3; Q05902; sce:YLR299W	2.46411e+07	3.54379e+07	1.09037e+07	2.36609e+07	4.57341e+07	5.38485e+07	6.89033e+07	5.6162e+07	2.37362	0.0296828
P40570	VLD1	D6VVU4; P40570; sce:YIR014W	4.33491e+07	4.9973e+07	5.76303e+07	5.03175e+07	8.13141e+07	9.12366e+07	6.4872e+07	7.91409e+07	1.57283	0.0298376
P38966	YDR089W	D6VS76; P38966; Q03192; sce:YDR089W	1.64772e+09	1.32588e+09	1.08456e+09	1.35272e+09	7.70805e+08	8.75732e+08	8.1647e+08	8.21003e+08	0.606927	0.032758
P43601	ATG18	D6VTQ1; P43601; sce:YFR021W	349498	373187	111155	277947	682450	728446	712281	707726	2.54627	0.033087
P32802	EMP70	D6VY83; P32802; Q12101; sce:YLR083C	1.09655e+08	1.12569e+08	6.94577e+07	9.72272e+07	2.40609e+07	2.79762e+07	2.93483e+07	2.71285e+07	0.279022	0.0357254
P53947	YNL058C	D6W1C1; P53947; sce:YNL058C	1.11317e+07	7.00221e+06	4.52654e+06	7.55349e+06	1.01765e+06	2.07055e+06	1.3737e+06	1.4873e+06	0.196902	0.0359097
P25625	PER1	D6VR53; P25625; sce:YCR044C	8.61962e+06	2.98562e+06	6.19534e+06	5.93353e+06	1.41701e+06	649844	293035	786631	0.132574	0.0365312
P39109	YCF1	D6VSB9; P39109; Q03905; sce:YDR135C	6.09738e+09	6.99151e+09	7.6366e+09	6.9085e+09	8.26572e+09	8.56886e+09	8.1212e+09	8.31859e+09	1.20411	0.0387742
P06105	SCP160	D6VWA3; P06105; sce:YJL080C	1.05673e+08	6.76014e+07	8.03571e+07	8.45439e+07	5.55233e+07	4.34353e+07	4.92842e+07	4.94142e+07	0.58448	0.0400409
P40152	YNL217W	D6W0X3; P40152; sce:YNL217W	1.5426e+08	1.60001e+08	1.49583e+08	1.54615e+08	3.6067e+08	2.55222e+08	3.70883e+08	3.28925e+08	2.12738	0.041352
P50944	AVT4	D6W178; P50944; sce:YNL101W	5.55425e+07	4.58659e+07	3.44618e+07	4.52901e+07	1.00013e+08	6.19733e+07	8.61028e+07	8.26965e+07	1.82593	0.0418994
P38753	HSE1	D3DKR2; P38753; sce:YHL002W		389237		389237	917129	747129	856806	840355	2.15898	0.0453792
P53191	PIB2	D6VUB4; E9P8Z2; P53191; sce:YGL023C	2.05469e+07	2.01207e+07	2.11411e+07	2.06029e+07	1.29964e+08	4.9149e+07	8.01339e+07	8.64157e+07	4.19435	0.0490314
P36018	YPT52	D6VX79; P36018; sce:YKR014C	1.82789e+08	1.99745e+08	1.66996e+08	1.83176e+08	7.63908e+07	1.01806e+08	1.57726e+08	1.11974e+08	0.611293	0.0509597
P40074	AVT6	D3DM25; P40074; sce:YER119C	1.36722e+08	1.16207e+08	1.03782e+08	1.18904e+08	2.45899e+08	1.79837e+08	1.59701e+08	1.95145e+08	1.6412	0.0515037
Q12013	AKR2	D6W2A0; Q12013; sce:YOR034C	1.54714e+08	9.13064e+07	1.68426e+08	1.38149e+08	3.945e+07	4.14523e+07	4.11147e+07	4.06723e+07	0.29441	0.0544751
P53838	BOR1	D6W0R9; P53838; sce:YNL275W	7.68335e+06	9.44977e+06	3.44955e+06	6.86089e+06	1.44502e+06	2.0605e+06	2.58444e+06	2.02998e+06	0.295878	0.0559027
Q12116	TMS1	D6VS91; Q12116; sce:YDR105C	3.32673e+07	3.19109e+07	2.60595e+07	3.04126e+07	7.89386e+07	4.9519e+07	8.33446e+07	7.06007e+07	2.32143	0.0577981
P53283	TPO2	D6VUR9; P53283; sce:YGR138C	8.84138e+07	1.282e+08	3.13183e+07	8.26442e+07	5.67678e+06	6.47766e+06	1.29855e+07	8.37999e+06	0.101398	0.0580364
P38959	VPS41	D6VS67; P38959; P87334; Q12011; sce:YDR080W	6.27293e+07	5.82952e+07	8.11997e+07	6.74081e+07	8.98547e+07	8.32181e+07	1.05995e+08	9.30227e+07	1.37999	0.0582512
Q05521	DPP1	D6VSR4; Q05521; sce:YDR284C	5.74656e+08	5.87213e+08	7.57979e+08	6.39949e+08	4.33859e+08	4.08016e+08	5.30829e+08	4.57568e+08	0.715007	0.0595941
Q08921	TCO89	D6W3I8; Q08921; sce:YPL180W	1.0967e+07	7.97765e+06	1.5303e+07	1.14159e+07	2.483e+07	6.20511e+07	3.39829e+07	4.0288e+07	3.52911	0.064451
P38287	CSH1	D6VQF6; P38287; sce:YBR161W	1.85612e+06	2.18291e+06	1.10429e+06	1.71444e+06	498476	264613	1.18457e+06	649219	0.378677	0.0651093
P53879	RHO5	D6W106; P53879; sce:YNL180C	6.068e+07	5.10682e+07	2.5447e+07	4.57317e+07	2.39967e+07	7.00399e+06	1.85413e+07	1.6514e+07	0.361106	0.0661585
Q12255	NYV1	D6VY93; Q12255; sce:YLR093C	4.50451e+08	3.46095e+08	4.06969e+08	4.01172e+08	2.77868e+08	2.82524e+08	3.52893e+08	3.04429e+08	0.758849	0.0672101
P47159	YJR124C	D6VWU3; P47159; Q6Q5M7; sce:YJR124C	6.40736e+07	6.43316e+07	9.70435e+07	7.51496e+07	1.00437e+08	1.14974e+08	9.88243e+07	1.04745e+08	1.39382	0.0706327
Q03308	VPS16	D6W3W9; Q03078; Q03308; sce:YPL045W	5.25643e+07	4.05124e+07	7.25437e+07	5.52068e+07	3.28627e+07	1.72152e+07	3.58863e+07	2.86547e+07	0.519044	0.0730325
P06780	RHO1	D6W4G6; P06780; sce:YPR165W	1.3386e+09	1.06028e+09	9.60248e+08	1.11971e+09	8.63914e+08	6.42607e+08	8.78417e+08	7.94979e+08	0.709989	0.0760846
P38142	YBR241C	D6VQN7; P38142; Q6B2Y5; sce:YBR241C	1.22554e+08	1.43923e+08	8.97903e+07	1.18756e+08	2.53619e+08	1.49646e+08	1.89112e+08	1.97459e+08	1.66273	0.082506
P27810	KTR1	D6W2G0; P27810; sce:YOR099W	2.98567e+08	2.56312e+08	1.40355e+08	2.31745e+08	8.44087e+07	1.20611e+08	1.43779e+08	1.16266e+08	0.501699	0.0835388
P41318	LST8	D6W1H1; P41318; sce:YNL006W	2.47057e+07	2.15583e+07	2.35517e+07	2.32719e+07	5.68228e+07	6.46439e+07	3.44829e+07	5.19832e+07	2.23373	0.0849322
P48836	VMA10	D3DKY7; P48836; sce:YHR039C-A	2.00704e+07	4.49712e+07	1.02119e+07	2.50845e+07	3.70281e+07	7.36413e+07	7.7447e+07	6.27055e+07	2.49977	0.0850775
P38130	KTR3	D6VQK3; E9P931; P38130; sce:YBR205W	2.24419e+08	2.0558e+08	9.49919e+07	1.74997e+08	7.23894e+07	6.02467e+07	1.04692e+08	7.91094e+07	0.452062	0.0870139
P32798	COT1	D6W314; P32798; sce:YOR316C	6.4183e+08	5.30787e+08	6.09589e+08	5.94069e+08	8.72028e+08	6.29944e+08	8.34061e+08	7.78678e+08	1.31075	0.0877482
Q08234	YOL075C	D6W1Z3; Q08233; Q08234; sce:YOL075C	1.00259e+07	9.76049e+06	3.34053e+06	7.70898e+06	1.60884e+06	333355	1.21414e+06	1.05211e+06	0.136479	0.0889329
Q12407	YDL199C	D6VRF5; Q12407; sce:YDL199C	6.48929e+07	8.23466e+07	6.27411e+07	6.99935e+07	7.92326e+07	8.75258e+07	9.74425e+07	8.8067e+07	1.25822	0.09055
Q00582	GTR1	D6W0G3; Q00582; sce:YML121W	9.23271e+06	9.50139e+06	1.85928e+07	1.24423e+07	7.56309e+06	4.41117e+06	3.13655e+06	5.03694e+06	0.404823	0.0912828
P39962	YCK3	D3DM29; P39962; sce:YER123W	6.36284e+08	5.22191e+08	4.81509e+08	5.46661e+08	4.9857e+08	2.94097e+08	3.29897e+08	3.74188e+08	0.684498	0.0921803
P53388	DIP5	D6W3A5; P53388; sce:YPL265W	8.10367e+07	7.15124e+07	3.38381e+07	6.21291e+07	1.93675e+07	1.77344e+07	1.72066e+07	1.81028e+07	0.291374	0.0922068
P42837	FIG4	D6W0M2; P42837; sce:YNL325C	9.78368e+07	2.05127e+08	1.00365e+08	1.34443e+08	1.99695e+08	2.07885e+08	2.58148e+08	2.2191e+08	1.65059	0.0928543
P40528	SYG1	D6VVN4; P40528; P40964; sce:YIL047C	6.46606e+08	5.14831e+08	3.74157e+08	5.11864e+08	1.01161e+09	6.17855e+08	8.10492e+08	8.13319e+08	1.58893	0.094674
P35724	MNR2	D6VXM3; P35724; sce:YKL064W	1.66268e+08	1.56832e+08	1.35798e+08	1.52966e+08	1.74545e+08	1.93019e+08	1.67774e+08	1.78446e+08	1.16657	0.0959349
P38329	VHC1	D6VQN1; P38329; sce:YBR235W	3.28988e+08	3.12171e+08	2.59344e+08	3.00167e+08	4.39856e+08	3.25925e+08	3.85259e+08	3.8368e+08	1.27822	0.0990585
P34756	FAB1	D6VTQ0; P34756; sce:YFR019W	1.71911e+07	2.30227e+07	3.58425e+07	2.53521e+07	1.23404e+07	1.19906e+07	1.56877e+07	1.33395e+07	0.526171	0.0999377
Q08227	INP54	D6W202; Q08227; sce:YOL065C	2.29039e+08	2.11603e+08	1.60796e+08	2.00479e+08	3.34899e+08	2.21624e+08	4.09825e+08	3.22116e+08	1.60673	0.10572
Q99385	VCX1	D6VRM2; O13580; O13581; Q99385; sce:YDL128W	8.52294e+08	9.21412e+08	1.03334e+09	9.35683e+08	7.22355e+08	8.82097e+08	7.53796e+08	7.86083e+08	0.840116	0.105941
P46989	ATG27	D6VW11; P46989; Q86ZR9; sce:YJL178C	1.50848e+09	1.48205e+09	1.9534e+09	1.64798e+09	1.88503e+09	2.87341e+09	2.21984e+09	2.32609e+09	1.41148	0.107575
Q12010	YPQ1	D6W1X6; Q12010; sce:YOL092W	4.92059e+08	7.11347e+08	5.54214e+08	5.85873e+08	8.2175e+08	7.78585e+08	6.59551e+08	7.53295e+08	1.28577	0.108545
P13856	RSR1	D6VUT2; P13856; sce:YGR152C	2.79842e+07	2.20784e+07	1.85392e+07	2.28673e+07	1.60398e+07	1.8399e+07	1.67277e+07	1.70555e+07	0.745848	0.110371
P53142	VPS73	D6VU42; P53142; sce:YGL104C	2.85354e+06	2.09301e+06	1.85442e+06	2.26699e+06	668316			668316	0.294803	0.117522
P43561	FET5	D6VTI9; P43561; sce:YFL041W	1.23251e+09	1.57185e+09	9.16307e+08	1.24022e+09	1.46928e+09	1.66849e+09	1.85172e+09	1.66316e+09	1.34102	0.125813
P10591	SSA1	D6VPL2; P10591; sce:YAL005C	2.52187e+07	2.17767e+07	1.00557e+07	1.9017e+07	2.93013e+07	2.63558e+07	4.66137e+07	3.40903e+07	1.79262	0.125816
Q07895	YLR001C	D6VY03; Q07895; sce:YLR001C	2.81648e+08	3.33741e+08	4.896e+08	3.68329e+08	2.79754e+08	2.31057e+08	2.31711e+08	2.47507e+08	0.671972	0.134419
P40514	YIL067C	D6VVL7; P40514; Q6B2R2; sce:YIL067C	4.33555e+06	3.483e+06	1.21248e+06	3.01034e+06	1.78096e+06	948825	852486	1.19409e+06	0.396662	0.13671
P47075	VTC4	D6VWG5; P47075; Q7Z872; Q86ZR4; sce:YJL012C	2.66983e+09	1.6829e+09	1.33142e+09	1.89472e+09	2.68836e+09	2.40104e+09	3.69215e+09	2.92718e+09	1.54492	0.139036
P38225	FAT1	D6VQ41; O60021; P38225; Q86ZS3; sce:YBR041W	2.32673e+08	3.21807e+08	7.43179e+08	4.32553e+08	8.34325e+08	6.07976e+08	7.96913e+08	7.46404e+08	1.72558	0.142643
P35169	TOR1	D6VWN7; P35169; sce:YJR066W	6.11227e+08	6.27527e+08	9.66348e+08	7.35034e+08	5.99166e+08	3.58223e+08	5.14097e+08	4.90495e+08	0.66731	0.145567
Q03823	YMR160W	D6VZY2; Q03823; sce:YMR160W	1.0101e+08	9.4716e+07	1.18747e+08	1.04824e+08	2.13509e+08	1.06575e+08	1.65814e+08	1.61966e+08	1.54512	0.146329
Q06810	OPY2	D6W479; Q06810; Q6B149; sce:YPR075C	3.31022e+07	1.5403e+07	2.08944e+07	2.31332e+07	9.20707e+06	1.6542e+07	1.32396e+07	1.29962e+07	0.5618	0.146919
P53290	GTR2	D6VUU7; P53290; sce:YGR163W	5.21967e+06	7.20924e+06	1.35287e+07	8.65254e+06	5.40736e+06	3.10671e+06	3.58313e+06	4.0324e+06	0.466037	0.150343
Q03441	RMD1	D6VRY7; Q03441; Q05210; sce:YDL001W	2.2639e+08	2.24599e+08	2.54672e+08	2.3522e+08	3.40759e+08	2.36852e+08	2.94073e+08	2.90561e+08	1.23527	0.154642
P32867	SSO1	D6W3D8; P32867; sce:YPL232W	1.31644e+08	5.91189e+07	2.59597e+07	7.22408e+07	2.1703e+07	2.52948e+06	2.49675e+07	1.64e+07	0.227018	0.155732
Q12016	VPS68	D6W1T9; Q12016; sce:YOL129W	3.0704e+07	9.22777e+07	8.18856e+07	6.82891e+07	1.54516e+07	3.48981e+07	4.565e+07	3.19999e+07	0.468594	0.158772
P34110	VPS35	D6VW33; P34110; sce:YJL154C	8.70157e+07	6.00972e+07	2.53172e+07	5.74767e+07	3.88934e+07	1.56209e+07	1.86122e+07	2.43755e+07	0.424093	0.161428
P17064	FCY2	D3DLV9; P17064; sce:YER056C	1.26118e+08	1.28961e+08	5.14554e+07	1.02178e+08	5.54766e+07	3.80974e+07	5.30409e+07	4.88716e+07	0.478299	0.16553
P32343	SSH4	D6VX71; P32343; sce:YKL124W	8.87053e+07	9.58083e+07	1.00046e+08	9.48531e+07	9.65988e+07	1.51014e+08	1.18877e+08	1.22163e+08	1.28792	0.165821
P38742	NPR3	D3DKU5; P38742; sce:YHL023C	7.04858e+06	5.28253e+06	1.0862e+07	7.73104e+06	4.60891e+06		2.74677e+06	3.67784e+06	0.475723	0.167527
P12868	PEP5	D6W057; P12868; sce:YMR231W	1.40639e+08	1.20371e+08	2.17272e+08	1.59428e+08	1.05473e+08	8.92242e+07	9.8254e+07	9.76505e+07	0.612507	0.168435
Q06247	YLR173W	D6VYH7; Q06247; sce:YLR173W	1.13176e+08	1.24247e+08	1.3466e+08	1.24028e+08	1.22382e+08	1.77574e+08	1.58651e+08	1.52869e+08	1.23254	0.17159
P20795	VPS33	D6VZ31; P20795; sce:YLR396C	7.74533e+07	9.91518e+07	4.21982e+07	7.29344e+07	1.04229e+08	9.61943e+07	1.01151e+08	1.00525e+08	1.37829	0.175062
Q12096	GNT1	D6W318; Q12096; sce:YOR320C	4.5867e+07	5.08499e+07	3.11563e+07	4.26244e+07	1.11482e+07	3.21132e+07	3.63424e+07	2.65346e+07	0.622522	0.175237
Q3E7B6	VMA9	D6VR05; Q3E7B6; sce:YCL005W-A	1.31084e+09	9.54385e+08	1.34358e+09	1.20294e+09	1.21163e+09	6.90825e+08	5.63624e+08	8.22025e+08	0.683348	0.179121
P21576	VPS1	D6VXT7; P21576; sce:YKR001C	2.88595e+08	2.36068e+08	3.99414e+08	3.08025e+08	1.83198e+08	2.44924e+08	2.46366e+08	2.24829e+08	0.729905	0.187901
Q04491	SEC13	D6VYK9; Q04491; sce:YLR208W	665069	2.15568e+06	82805.7	967850	3.19246e+06	988315	3.3979e+06	2.52622e+06	2.61014	0.189797
P32610	VMA8	D3DLJ9; P32610; sce:YEL051W	1.31748e+08	1.10326e+08	7.5766e+07	1.05947e+08	1.73877e+08	1.03796e+08	1.70314e+08	1.49329e+08	1.40947	0.196525
P30605	ITR1	D6VTB9; P30605; sce:YDR497C	1.30809e+08	7.25791e+07	5.00715e+07	8.44867e+07	6.22218e+07	3.90973e+07	3.40144e+07	4.51111e+07	0.533944	0.198474
P39980	SIT1	D3DLI5; E9P951; P39980; sce:YEL065W	1.20106e+06	1.41445e+06	244049	953186	2.61106e+06	780538	3.29392e+06	2.22851e+06	2.33795	0.200166
Q03516	RSN1	D6W092; Q03516; sce:YMR266W	4.58381e+08	4.06569e+08	1.23091e+08	3.29347e+08	1.79415e+08	1.00553e+08	1.3005e+08	1.36673e+08	0.414981	0.201443
Q12241	VAM3	D6W2G5; Q12241; sce:YOR106W	1.82461e+08	9.46772e+07	1.25058e+08	1.34066e+08	1.23958e+08	6.54144e+07	6.61542e+07	8.51756e+07	0.635328	0.203842
P47008	SFH5	D6VW40; P47008; Q6Q535; sce:YJL145W	7.13794e+06	5.43788e+06	3.84663e+06	5.47415e+06	8.01596e+06	5.81309e+06	1.23892e+07	8.73942e+06	1.59649	0.204047
P31412	VMA5	D6VXK7; P31412; sce:YKL080W	4.98133e+07	1.35832e+08	4.8775e+07	7.81401e+07	9.01124e+07	1.47997e+08	2.90665e+08	1.76258e+08	2.25567	0.212485
P38182	ATG8	D6VPS5; P38182; sce:YBL078C	2.32834e+07	2.79357e+07	3.70224e+07	2.94138e+07	3.05525e+07	5.43588e+07	3.88788e+07	4.12634e+07	1.40286	0.215357
Q04121	NHX1	D6VT80; Q04121; sce:YDR456W	4.0785e+06	2.73177e+06	1.22406e+06	2.67811e+06	1.52571e+06	1.86752e+06	746692	1.37997e+06	0.515279	0.217865
Q04562	TMN2	D6VS93; Q04562; sce:YDR107C	4.62599e+06	4.33991e+06	1.83955e+06	3.60182e+06	1.96472e+06	2.40403e+06	1.85852e+06	2.07576e+06	0.576308	0.223928
P14772	BPT1	D6VXY7; P14772; sce:YLL015W	1.20186e+09	1.25596e+09	1.79885e+09	1.41889e+09	1.69591e+09	1.79185e+09	1.73064e+09	1.73947e+09	1.22594	0.232891
P53011	SEH1	D6VU45; P53011; sce:YGL100W	1.44104e+08	1.47241e+08	7.74918e+07	1.22946e+08	1.15807e+08	4.50929e+07	8.18019e+07	8.09006e+07	0.65802	0.240958
P18962	DAP2	D3DKX5; E9P957; P18962; sce:YHR028C	2.09589e+09	2.17897e+09	2.39149e+09	2.22212e+09	2.17534e+09	2.56149e+09	2.58659e+09	2.44114e+09	1.09856	0.24181
P53918	ESBP6	D6W158; P53918; sce:YNL125C	4.07837e+06	3.45474e+06	276653	2.60326e+06	764438	428068	849768	680758	0.261503	0.243089
P50945	MIC27	D6W179; P50945; Q45U03; sce:YNL100W	3.56987e+08	2.82326e+08	1.03922e+08	2.47745e+08	2.09988e+08	9.41057e+07	9.43574e+07	1.32817e+08	0.536103	0.244973
P25356	BPH1	D6VR42; P25356; Q02396; Q07348; sce:YCR032W	3.45013e+07	3.11508e+07	4.15976e+07	3.57499e+07	4.11194e+07	9.79966e+06	1.47669e+07	2.18953e+07	0.612458	0.245725
P22543	VPS34	D6VYN8; P22543; sce:YLR240W	7.49346e+07	7.34562e+07	9.46312e+07	8.10073e+07	7.4367e+07	6.26358e+07	7.40682e+07	7.0357e+07	0.868526	0.245977
P47040	YHC3	D6VWC3; O60004; P47040; Q6B1E1; sce:YJL059W	1.64393e+07	1.7328e+07	1.47924e+07	1.61865e+07	2.84481e+07	1.75364e+07	1.88724e+07	2.1619e+07	1.33561	0.251905
Q06451	TPO3	D6W4F2; Q06451; sce:YPR156C	1.82392e+08	2.19246e+08	3.97955e+07	1.47145e+08	8.31278e+07	4.47212e+07	9.04723e+07	7.27737e+07	0.494573	0.25863
P32600	TOR2	D6VX00; P32600; sce:YKL203C	1.65252e+08	1.7065e+08	4.04045e+08	2.46649e+08	1.3176e+08	1.11666e+08	1.29663e+08	1.24363e+08	0.50421	0.260039
P38301	GDT1	D6VQI2; E9PAD4; P38301; Q6Q545; sce:YBR187W	4.75271e+07	3.65997e+07	1.28162e+07	3.23143e+07	2.33394e+07	1.27782e+07	1.97326e+07	1.86168e+07	0.576115	0.26989
Q12057	PIN2	D6W2G4; Q12057; sce:YOR104W	3.02539e+06	1.29526e+06	646700	1.65578e+06	196089		628106	412098	0.248884	0.27371
P38356	BSD2	D6VQT5; P38356; sce:YBR290W	1.09419e+06	1.34929e+06	221749	888410	477312	322500	344053	381288	0.429181	0.274569
Q02205	MEH1	D6VX73; Q02205; sce:YKR007W	9.66802e+07	4.7768e+07	1.24305e+08	8.95845e+07	9.40265e+07	3.45272e+07	2.53209e+07	5.12915e+07	0.572549	0.285054
P21801	SDH2	D6VXW5; P21801; sce:YLL041C	5.89691e+07	6.39396e+07	1.82655e+07	4.70581e+07	5.02506e+07	6.69481e+07	9.87986e+07	7.19991e+07	1.53	0.28656
P27514	PHO91	D6W1I8; P27514; sce:YNR013C	1.68406e+09	1.34726e+09	1.11243e+09	1.38125e+09	1.35717e+09	1.0912e+09	9.33455e+08	1.12728e+09	0.816127	0.286919
P47041	BIT61	D6VWC4; P47041; sce:YJL058C	480286	518776	1.0295e+06	676189		466442	271793	369117	0.545879	0.290309
Q12301	YDL180W	D6VRH2; Q12301; sce:YDL180W	9.80664e+07	8.03345e+07	8.21233e+07	8.68414e+07	1.27928e+08	8.55257e+07	9.73861e+07	1.03613e+08	1.19313	0.291985
P39968	VAC8	D3DLN6; P39968; Q549T0; sce:YEL013W	5.62348e+09	4.10075e+09	6.4745e+09	5.39958e+09	4.49124e+09	4.26595e+09	4.87677e+09	4.54465e+09	0.841668	0.298939
Q04338	VTI1	D6W022; Q04338; sce:YMR197C	6.89683e+08	5.49637e+08	5.27473e+08	5.88931e+08	7.16702e+08	7.96236e+08	5.5975e+08	6.90896e+08	1.17314	0.301657
P38244	PFF1	D6VQ74; P38244; P38245; Q86ZS2; sce:YBR074W	1.70122e+09	1.78497e+09	2.05075e+09	1.84565e+09	1.76689e+09	1.78606e+09	1.4369e+09	1.66328e+09	0.901191	0.303903
Q04162	YDR387C	D6VT21; Q04162; sce:YDR387C	1.65891e+07	1.88884e+07	2.56036e+07	2.03604e+07	2.44201e+07	2.83409e+07	2.06135e+07	2.44582e+07	1.20126	0.307355
P27801	PEP3	D6VYE3; P27801; sce:YLR148W	9.32311e+07	1.07874e+08	1.88951e+08	1.30019e+08	5.07513e+07	7.91478e+07	1.29311e+08	8.64034e+07	0.664546	0.310552
Q06328	YPQ2	D6VSY2; Q06328; sce:YDR352W	1.9955e+06	3.03556e+06	890573	1.97388e+06	1.80345e+06	1.15269e+06	382408	1.11285e+06	0.563789	0.311047
Q08299	ENB1	D6W1R2; Q08299; sce:YOL158C	2.95426e+07	2.17107e+07	5.91842e+06	1.90573e+07	3.97146e+07	1.68863e+07	3.35873e+07	3.00627e+07	1.5775	0.321527
Q06651	PIB1	D6VSU2; Q06651; Q6Q5S5; sce:YDR313C	3.10766e+06		1.77594e+06	2.4418e+06	1.10806e+06	1.27189e+06	1.3775e+06	1.25248e+06	0.512935	0.321699
Q04602	VBA4	D6VSA4; Q04602; sce:YDR119W	4.84621e+08	3.59142e+08	3.08697e+08	3.84153e+08	6.38655e+08	3.63204e+08	4.71849e+08	4.91236e+08	1.27875	0.325674
P22219	VPS15	D6VQ98; P22219; sce:YBR097W	4.0072e+09	4.1516e+09	1.4855e+09	3.21477e+09	2.16401e+09	1.66642e+09	2.73232e+09	2.18758e+09	0.680479	0.326179
P32366	VMA6	D6VZ81; P32366; sce:YLR447C	1.28113e+09	1.99227e+09	7.38601e+08	1.33733e+09	7.48449e+08	9.05898e+08	1.09737e+09	9.17238e+08	0.685871	0.327301
P11491	PHO8	D6VTA4; E9P949; P11491; Q03374; sce:YDR481C	2.9092e+09	2.75402e+09	2.43061e+09	2.69794e+09	3.52137e+09	2.90415e+09	2.63909e+09	3.02154e+09	1.11994	0.337108
Q03730	YML018C	D6VZF6; Q03730; Q6B2K7; sce:YML018C	1.63764e+08	1.02976e+08	1.05407e+08	1.24049e+08	2.83628e+08	1.21265e+08	1.38896e+08	1.81263e+08	1.46122	0.358052
P38731	ARN1	D3DKS9; P38731; sce:YHL040C	392510	458185	217563	356086	328819	682303	2.86917e+06	1.29343e+06	3.63235	0.359263
P43555	EMP47	D6VTI2; P43555; sce:YFL048C	2.57071e+08	2.94524e+08	1.73139e+08	2.41578e+08	2.20489e+08	3.86406e+08	3.03017e+08	3.03304e+08	1.25551	0.360649
P31381	FUN26	D6VPJ6; P31381; sce:YAL022C	1.31156e+08	1.04094e+08	1.1638e+08	1.1721e+08	1.92569e+08	1.22973e+08	1.15012e+08	1.43518e+08	1.22445	0.366279
P38090	AGP2	D6VQC9; P38090; sce:YBR132C	4.23315e+07	3.48004e+07	2.01147e+07	3.24155e+07	2.48659e+07	2.18676e+07	2.96831e+07	2.54722e+07	0.785802	0.371782
Q08157	YOL019W	D6W247; Q08157; sce:YOL019W	3.04291e+07	2.40424e+07	8.84371e+06	2.11051e+07	3.13199e+07	2.4054e+07	2.81076e+07	2.78272e+07	1.31851	0.374929
Q05919	VPS38	D6VYZ7; Q05919; Q6B1J7; sce:YLR360W	1.39118e+07	1.34632e+07	3.45906e+07	2.06552e+07	1.01009e+07	1.27469e+07	1.56482e+07	1.2832e+07	0.621246	0.378699
Q12209	FRE8	D6VY49; Q12209; sce:YLR047C	1.35899e+08	1.27469e+08	1.09863e+08	1.2441e+08	1.30963e+08	1.2214e+08	1.65373e+08	1.39492e+08	1.12123	0.378855
P39923	NPR2	D3DLI8; P39923; Q6B264; sce:YEL062W	9.35005e+06	3.77043e+06	2.76062e+07	1.35755e+07	1.17737e+07	3.78321e+06	4.19418e+06	6.58368e+06	0.484966	0.412567
Q12473	FRE6	D6VXV7; Q12473; sce:YLL051C	1.3251e+08	1.16852e+08	1.62875e+08	1.37412e+08	1.79091e+08	1.16565e+08	1.85551e+08	1.60402e+08	1.16731	0.423491
P40501	AVT7	D6VVJ9; P40501; sce:YIL088C	2.96322e+08	4.12414e+08	4.6555e+08	3.91429e+08	4.08932e+08	4.57428e+08	4.45735e+08	4.37365e+08	1.11735	0.427402
P39111	VMA7	D6VUF5; P39111; sce:YGR020C	246978	835383		541180	2.77246e+06	996378	389796	1.38621e+06	2.56146	0.438665
P23643	VPS3	D6VTB7; P23643; sce:YDR495C	3.97532e+06	4.99866e+06	5.78171e+06	4.91857e+06	6.80955e+06	3.89781e+06	6.92947e+06	5.87894e+06	1.19526	0.439778
P40857	PHS1	D6VW87; P40857; sce:YJL097W	4.05772e+07	3.69038e+07	2.1199e+07	3.28933e+07	2.77576e+07	2.39432e+07	3.08605e+07	2.75204e+07	0.836658	0.439808
Q07468	VAM6	D6VRS2; Q07468; sce:YDL077C	1.03879e+08	8.76606e+07	1.89074e+08	1.26871e+08	8.93201e+07	9.58968e+07	1.07053e+08	9.74233e+07	0.76789	0.448756
P38778	SMF2	D3DKZ8; P38778; sce:YHR050W	5.53967e+06	6.06239e+06	1.946e+06	4.51602e+06	7.69311e+06	4.59115e+06	5.26003e+06	5.8481e+06	1.29497	0.45211
P32854	PEP12	D6W2A3; P32854; sce:YOR036W	4.23746e+07	2.45003e+07	2.85406e+07	3.18052e+07	3.14948e+07	2.90759e+07	1.84805e+07	2.63504e+07	0.828494	0.462958
Q12284	ERV2	D6W448; Q12284; sce:YPR037C	2.82711e+07	2.91742e+07	1.69073e+07	2.47842e+07	1.9085e+07	2.1791e+07	2.34007e+07	2.14255e+07	0.864483	0.463027
P32563	VPH1	D6W2X0; P32563; sce:YOR270C	1.5716e+10	1.72424e+10	1.9832e+10	1.75968e+10	1.31677e+10	1.94489e+10	1.47679e+10	1.57948e+10	0.897597	0.465279
P22203	VMA4	D6W328; P22203; sce:YOR332W	2.76937e+08	4.50576e+08	1.60375e+08	2.95963e+08	2.33051e+08	5.56047e+08	4.01862e+08	3.96987e+08	1.34134	0.466724
Q12256	TPO4	D6W2X3; Q12256; sce:YOR273C	2.07303e+08	2.60252e+08	1.17108e+08	1.94888e+08	2.3538e+08	1.98848e+08	2.57424e+08	2.30551e+08	1.18299	0.473715
Q02948	VPS30	D6W3P7; Q02948; sce:YPL120W	3.83425e+07	3.49264e+07	5.47889e+07	4.26859e+07	3.31669e+07	4.1068e+07	3.86947e+07	3.76432e+07	0.881865	0.485119
P20107	ZRC1	D6W070; P20107; sce:YMR243C	2.87872e+09	2.75468e+09	2.38445e+09	2.67262e+09	4.10235e+09	2.42511e+09	2.72666e+09	3.08471e+09	1.15419	0.485747
P53285	VPS62	D6VUS1; P53285; sce:YGR141W	5.309e+08	4.0338e+08	4.3426e+08	4.5618e+08	6.15391e+08	4.36938e+08	4.68698e+08	5.07009e+08	1.11142	0.490623
P33311	MDL2	D6W3A0; P33311; Q08983; sce:YPL270W	1.2681e+08	9.16735e+07	4.81654e+07	8.8883e+07	1.02462e+08	3.92058e+07	5.92999e+07	6.69894e+07	0.75368	0.498125
P11792	SCH9	D3DLF4; P11792; sce:YHR205W	1.88425e+06	1.37524e+06	3.03103e+06	2.09684e+06	986376	3.40575e+06	4.30314e+06	2.89842e+06	1.38228	0.508336
Q07549	SNA4	D6VRM7; Q07549; sce:YDL123W	3.84147e+08	1.8329e+08	9.63603e+07	2.21266e+08	4.22711e+08	1.90819e+08	2.79928e+08	2.9782e+08	1.34598	0.520238
Q12003	ENV7	D6W3D4; Q12003; Q7LGU7; sce:YPL236C	6.89194e+07	8.0487e+07	1.04966e+08	8.47908e+07	9.50506e+07	7.41885e+07	1.20604e+08	9.66143e+07	1.13944	0.52776
P50079	HSV2	D6VV05; P50079; sce:YGR223C	3.74516e+07	1.97539e+07	7.26376e+07	4.3281e+07	6.07566e+07	3.54415e+07	7.00113e+07	5.54031e+07	1.28008	0.551411
Q07824	TPO1	D6VXX6; Q07824; sce:YLL028W	1.32758e+08	1.37551e+08	3.63823e+07	1.0223e+08	1.01101e+08	5.31149e+07	8.3057e+07	7.9091e+07	0.773654	0.55328
P17255	VMA1	D6VRG7; O74301; P17255; Q9Y7W5; sce:YDL185W	1.18349e+09	1.76601e+09	6.35301e+08	1.19493e+09	9.71396e+08	1.81157e+09	1.59581e+09	1.45959e+09	1.22149	0.555917
P19073	CDC42	D6VYN1; P19073; Q05978; sce:YLR229C	7.89296e+08	7.52967e+08	3.2048e+08	6.20915e+08	1.14601e+09	5.0467e+08	6.71227e+08	7.73969e+08	1.2465	0.564678
P53882	TDA7	D6W109; P53882; sce:YNL176C	9.49308e+06	1.76239e+06	1.3303e+06	4.19526e+06	3.06437e+06	2.11474e+06	2.03048e+06	2.4032e+06	0.572837	0.569732
P25371	ADP1	D6VR20; P25371; sce:YCR011C	1.50905e+09	1.57083e+09	2.10126e+09	1.72705e+09	2.01357e+09	2.03038e+09	1.57799e+09	1.87398e+09	1.08508	0.572376
P40335	PEP8	D6VWC9; E9P910; P40335; sce:YJL053W	1.07599e+07	1.13456e+07	1.05509e+07	1.08855e+07	1.35859e+07	7.05217e+06	8.0476e+06	9.56188e+06	0.878409	0.582519
P41807	VMA13	D6W446; P41807; sce:YPR036W	1.14138e+08	2.03084e+08	1.53078e+08	1.56767e+08	1.53991e+08	1.40872e+08	2.53849e+08	1.82904e+08	1.16673	0.584394
Q04272	VPS20	D6VZQ1; Q04272; sce:YMR077C	2.73035e+06	2.3711e+06	1.42519e+06	2.17554e+06	1.96392e+06	962238	2.53402e+06	1.82006e+06	0.836599	0.586677
P10592	SSA2	D6VXY0; P10592; sce:YLL024C	3.4584e+08	3.14036e+08	2.36393e+08	2.98757e+08	2.51853e+08	3.19151e+08	4.35644e+08	3.35549e+08	1.12315	0.589194
P38873	KOG1	D3DLD4; P38873; sce:YHR186C	1.09851e+08	1.42392e+08	2.973e+08	1.83181e+08	1.85588e+08	2.24309e+08	2.41604e+08	2.17167e+08	1.18553	0.602256
P37296	STV1	D6VZM9; P37296; sce:YMR054W	2.24328e+08	2.65201e+08	2.98431e+08	2.62653e+08	2.00558e+08	2.89078e+08	2.42763e+08	2.44133e+08	0.929487	0.608325
P32939	YPT7	D6VZH4; P32939; sce:YML001W	1.28777e+09	1.41746e+09	1.82567e+09	1.5103e+09	1.32608e+09	1.81994e+09	1.73891e+09	1.62831e+09	1.07814	0.624411
P47082	AVT1	D6VWH5; P47082; sce:YJR001W	3.12338e+08	3.0153e+08	3.39805e+08	3.17891e+08	3.43462e+08	3.07799e+08	2.60586e+08	3.03949e+08	0.956143	0.627488
Q12296	MAM3	D6W207; Q12296; sce:YOL060C	5.93104e+08	3.9139e+08	5.94966e+08	5.26486e+08	6.67989e+08	5.16648e+08	5.21563e+08	5.68733e+08	1.08024	0.640795
P21560	CBP3	D6W3F5; P21560; sce:YPL215W	6.8388e+07	6.47357e+07	1.39192e+07	4.90143e+07	2.9264e+07	3.70038e+07	5.33585e+07	3.98754e+07	0.813547	0.654982
P25515	VMA3	D3DLM1; P25515; sce:YEL027W	2.48888e+08	2.19455e+08	7.63319e+08	4.10554e+08	1.03132e+09	3.23972e+08	3.05773e+08	5.53687e+08	1.34863	0.655099
Q06708	VAC14	D6VZ21; Q06708; sce:YLR386W	1.11044e+08	1.42837e+08	2.59146e+08	1.71009e+08	1.57317e+08	1.4323e+08	3.15364e+08	2.05303e+08	1.20054	0.655261
P32912	VAM7	D6VTU3; P32912; sce:YGL212W	1.6129e+08	1.22589e+08	1.00302e+08	1.2806e+08	1.21239e+08	1.34285e+08	1.02439e+08	1.19321e+08	0.931758	0.685742
Q03446	RCR2	D6VRZ0; Q03446; sce:YDR003W	1.4792e+07	1.15216e+07	4.55155e+06	1.02884e+07	8.6801e+06	7.98551e+06	1.03683e+07	9.0113e+06	0.875871	0.701628
P53950	VAC7	D6W1C5; P53950; sce:YNL054W	6.38708e+07	5.16378e+07	3.60554e+07	5.05213e+07	4.55964e+07	4.81138e+07	4.80948e+07	4.72683e+07	0.935612	0.708248
P02994	TEF1; TEF2	D6VQB6; P02994; Q7Z7U8; Q7Z8Q8; Q7Z8Q9; sce:YBR118W; sce:YPR080W	1.18412e+09	9.0755e+08	1.24988e+09	1.11385e+09	8.94254e+08	9.25402e+08	1.31756e+09	1.04574e+09	0.93885	0.712179
P38164	SEA4	D6VPP9; P38164; Q86ZS4; sce:YBL104C	3.44351e+07	2.95486e+07	7.6118e+07	4.67005e+07	4.76369e+07	3.86273e+07	3.47725e+07	4.03456e+07	0.86392	0.713277
Q02887	ATG21	D6W3R6; Q02887; sce:YPL100W	1.5321e+07	8.59353e+06	2.95543e+07	1.7823e+07	3.27539e+07	1.33691e+07	1.72532e+07	2.11254e+07	1.18529	0.719227
P33300	SUR1	D6W3V7; P33300; sce:YPL057C	9.7952e+06	9.46808e+06	2590609	7.28463e+06	8.25702e+06	3.4374e+06	6.96969e+06	6.22137e+06	0.854041	0.719244
Q12200	NCR1	D6W406; Q12200; sce:YPL006W	1.35536e+09	1.59585e+09	1.92965e+09	1.62695e+09	1.41608e+09	1.75265e+09	1.48825e+09	1.55233e+09	0.954133	0.721997
Q08281	RTC1	D6W1T1; Q08281; Q92271; sce:YOL138C	1.52594e+07	2.20934e+07	2.4936e+07	2.07629e+07	1.68277e+07	2.60908e+07	2.35468e+07	2.21551e+07	1.06705	0.744436
Q04119	PPN1	D6VT77; Q04119; sce:YDR452W	2.46379e+08	3.11544e+08	5.26424e+07	2.03522e+08	1.76838e+08	1.59795e+08	1.91088e+08	1.75907e+08	0.864315	0.757164
P40482	SEC24	D6VVH8; P40482; sce:YIL109C	4.22321e+07	5.05106e+07	5.72412e+07	4.99946e+07	5.74312e+07	3.40239e+07	5.04888e+07	4.73146e+07	0.946395	0.759804
P25621	FEN2	D6VR38; P25621; sce:YCR028C	4.16368e+06	3.47566e+06	551243	2.7302e+06	1.1755e+06	4.12273e+06	1.5509e+06	2.28304e+06	0.836219	0.772232
Q12324	YVC1	D6W2E9; Q08500; Q12324; Q7LGN3; sce:YOR087W	7.85506e+08	7.80185e+08	9.68224e+08	8.44638e+08	8.05817e+08	6.50319e+08	9.90701e+08	8.15612e+08	0.965635	0.815034
Q07376	MCH1	D6VRU2; Q07376; sce:YDL054C	2.19997e+08	1.82386e+08	1.97451e+08	1.99945e+08	2.79684e+08	1.42047e+08	2.02721e+08	2.08151e+08	1.04104	0.852181
P36062	AVT3	D6VX50; P36062; sce:YKL146W	1.51365e+08	1.98084e+08	2.05314e+08	1.84921e+08	1.93169e+08	1.87595e+08	1.62596e+08	1.8112e+08	0.979444	0.853804
Q12424	YDL206W	D6VRE8; Q12424; sce:YDL206W	7.09657e+06	8.23899e+06	7.9513e+06	7.76229e+06	8.60382e+06	3.73048e+06	9.80413e+06	7.37948e+06	0.950683	0.857049
Q12042	YPL162C	D6W3K6; Q12042; sce:YPL162C	8.24959e+07	7.9148e+07	8.75608e+07	8.30682e+07	1.42872e+08	5.1127e+07	3.59711e+07	7.66568e+07	0.922817	0.865667
P32842	VMA11	D6W3D6; P32365; P32842; sce:YPL234C	2.62312e+08	2.16613e+08	4.42476e+08	3.07134e+08	5.5124e+08	2.5742e+08	1.83638e+08	3.30766e+08	1.07695	0.866368
P38929	PMC1	D6VUD2; P38929; sce:YGL006W	2.31728e+09	2.64719e+09	2.76493e+09	2.57647e+09	2.2847e+09	2.55582e+09	3.01605e+09	2.61886e+09	1.01645	0.87459
Q02725	VTC3	D6W3Z3; Q02725; sce:YPL019C	3.47906e+09	1.91907e+09	1.44814e+09	2.28209e+09	2.25926e+09	1.22876e+09	2.96296e+09	2.15033e+09	0.942262	0.876229
P48558	BXI1	D6W0P0; P48558; Q6B2Q1; sce:YNL305C	1.27343e+08	1.19626e+08	9.88419e+07	1.1527e+08	9.73142e+07	9.34193e+07	1.66245e+08	1.18993e+08	1.0323	0.889434
P14359	SNA3	D6VW35; P14359; Q6B236; sce:YJL151C	8.21591e+06	2.40891e+06	357854	3.66089e+06	6.72686e+06	2.21166e+06	3.08472e+06	4.00774e+06	1.09475	0.905008
P42836	PFA3	D6W0M1; P42836; sce:YNL326C	8.15301e+07	9.22891e+07	6.5672e+07	7.98304e+07	1.07591e+08	5.46312e+07	8.31582e+07	8.17934e+07	1.02459	0.914363
P27614	CPS1	D6VW16; P27614; sce:YJL172W	9.858e+08	8.77229e+08	2.29057e+08	6.97362e+08	6.26461e+08	7.63056e+08	6.20621e+08	6.70046e+08	0.96083	0.919372
P16140	VMA2	D6VQC4; P16140; P32123; sce:YBR127C	1.09171e+09	2.1039e+09	7.40807e+08	1.31214e+09	8.79183e+08	1.82855e+09	1.38712e+09	1.36495e+09	1.04025	0.919715
P53273	YGR125W	D6VUQ7; P53273; sce:YGR125W	5.89544e+08	4.2554e+08	4.145e+08	4.76528e+08	5.29425e+08	4.55308e+08	4.63426e+08	4.8272e+08	1.01299	0.924372
P39547	UIP3	D6VPM9; P39547; sce:YAR027W	3.99821e+07	3.04462e+07	1.23201e+07	2.75828e+07	4.18666e+07	1.96534e+07	1.97894e+07	2.71031e+07	0.98261	0.967215
P40046	VTC1	D3DLX7; P40046; sce:YER072W	1.19989e+09	7.88762e+08	6.79877e+08	8.8951e+08	1.00504e+09	7.22558e+08	9.34537e+08	8.87379e+08	0.997605	0.991107
P46996	YJL163C	D6VW24; P46996; sce:YJL163C	1.18545e+07	1.43992e+07	1.38602e+07	1.33713e+07	2.15717e+07	7.30923e+06	1.12539e+07	1.33783e+07	1.00052	0.998787
P32335	MSS51	D6VYK4; P32335; sce:YLR203C	1.58851e+07	1.76652e+07	7.90019e+06	1.38168e+07	1.23721e+07	1.12185e+07	1.78769e+07	1.38225e+07	1.00041	0.99883
P38724	ARN2	D3DKS4; P38724; sce:YHL047C					2.74577e+06		383053	1.56441e+06	*	*
P38735	VMR1	D3DKT3; P38735; sce:YHL035C		1.05356e+06		1.05356e+06					**	**
P38273	CCZ1	D6VQC8; P38273; sce:YBR131W	1.91898e+07		1.31493e+07	1.61695e+07					**	**
P38279	RTC2	D6VQE2; P38279; sce:YBR147W			104133	104133			218963	218963	2.10273
